# Supplementary material
Source: publisher figshare collection journal article supplement (https://gsajournals.figshare.com/ndownloader/files/16411769)
Supplement: Supplementary file 1 [file 16411769]

## Sheet: Ler_ult1-3
Table S3. Genes differentially expressed between Ler and ult1-3 inflorescence apices, p ≤ 0.05, FC ≥ 1.5
Array element	ID	Locus	Description	logFC	FC, ult1-3 IFM	AveExpr(log2)	AveExpresn	t	p-value	adj. p-value
253811_at	8911	AT4G28190	ULT1 (ULTRAPETALA1); DNA binding	-3.29878	0.101618	6.82046	113.022	-32.1065	9.62486e-10	5.48858e-06
253532_at	8632	AT4G31570	nucleoporin protein	-3.07481	0.118683	6.27956	77.685	-20.2855	3.63797e-08	2.89288e-05
253689_at	8789	AT4G29770	HTT1 (HEAT-INDUCED TAS1 TARGET 1)	-2.65596	0.158664	7.67451	204.296	-28.8179	2.26981e-09	6.47181e-06
264301_at	19401	AT1G78780	pathogenesis-related family protein	-2.63301	0.161208	6.61576	98.0715	-13.6731	7.87354e-07	0.000224494
253835_at	8935	AT4G27820	beta glucosidase 9	-2.07296	0.237672	7.30677	158.327	-27.0132	3.79014e-09	6.54664e-06
254002_at	9102	AT4G26280	P-loop containing nucleoside triphosphate hydrolases superfamily protein	-2.06649	0.23874	7.19458	146.482	-20.2573	3.67792e-08	2.89288e-05
258897_at	13997	AT3G05730	defensin-like (DEFL) family protein	-1.91633	0.264927	6.1524	71.1304	-18.1487	8.71375e-08	5.23055e-05
257264_at	12364	AT3G22060	receptor protein kinase-related	-1.84661	0.278044	5.88066	58.9189	-17.6238	1.09634e-07	6.09937e-05
254452_at	9552	AT4G21100	DDB1B (DAMAGED DNA BINDING PROTEIN 1 B)	-1.79332	0.288507	7.30555	158.194	-11.808	2.4212e-06	0.000457531
253957_at	9057	AT4G26320	AGP13 (ARABINOGALACTAN PROTEIN 13)	-1.79278	0.288615	6.36055	82.1703	-28.9033	2.21715e-09	6.47181e-06
260396_at	15496	AT1G69720	HO3 (HEME OXYGENASE 3); heme oxygenase (decyclizing)	-1.77915	0.291355	6.06324	66.8679	-18.6786	6.95464e-08	4.36062e-05
248864_at	3964	AT5G46760	MYC3; basic helix-loop-helix (bHLH)transcription factor family protein	-1.47317	0.360189	9.48307	715.628	-25.5374	5.91378e-09	8.47918e-06
261618_at	16718	AT1G33110	MATE efflux family protein	-1.46066	0.363327	6.5949	96.6632	-25.094	6.79287e-09	8.60807e-06
253945_at	9045	AT4G27050	F-box/RNI-like family protein	-1.38915	0.381789	8.96165	498.568	-23.22	1.25447e-08	1.50602e-05
248868_at	3968	AT5G46780	VQ motif-containing protein	-1.37542	0.385442	6.88	117.784	-8.22252	3.57937e-05	0.00250446
245504_at	604	AT4G15660	ROXY15; CC-type glutaredoxin (ROXY) family protein	-1.26147	0.417119	6.05979	66.7081	-12.6089	1.46711e-06	0.000328086
248841_at	3941	AT5G46740	UBP21 (UBIQUITIN-SPECIFIC PROTEASE 21); ubiquitin-specific protease	-1.25622	0.418638	8.33489	322.887	-17.6456	1.08582e-07	6.09937e-05
251196_at	6296	AT3G62950	ROXY4; CC-type glutaredoxin (ROXY) family protein	-1.24479	0.421968	6.04797	66.1637	-13.0764	1.10975e-06	0.000271329
264774_at	19874	AT1G22890	transmembrane protein; similar to unknown protein [Arabidopsis thaliana] (TAIR:AT5G44568.1); contains domain FAMILY NOT NAMED (PTHR12953); contains domain SUBFAMILY NOT NAMED (PTHR12953:SF10)	-1.22087	0.429024	8.63056	396.331	-11.8427	2.36769e-06	0.000457246
248863_at	3963	AT5G46750	AGD8 (ARF-GAP DOMAIN 8); DNA binding	-1.21986	0.429323	10.3731	1326.18	-21.9548	1.95181e-08	2.22604e-05
260621_at	15721	AT1G08065	ACA5 (ALPHA CARBONIC ANHYDRASE 5)	-1.20851	0.432715	8.37387	331.731	-8.20497	3.63514e-05	0.00253571
252367_at	7467	AT3G48360	BT2 (BTB and TAZ domain protein 2); protein binding / transcription regulator	-1.18479	0.439887	8.30982	317.326	-11.4789	3.00128e-06	0.000547674
245506_at	606	AT4G15700	ROXY11; CC-type glutaredoxin (ROXY) family protein	-1.17832	0.441867	5.21566	37.1595	-9.02734	1.81057e-05	0.00173655
246080_at	1180	AT5G20460	hypothetical protein	-1.15874	0.447905	5.09722	34.2308	-9.03341	1.80165e-05	0.00173655
257417_at	12517	AT1G10110	F-box family protein	-1.128	0.45755	6.98392	126.581	-14.931	3.98794e-07	0.000146718
265511_at	20611	AT2G05540	glycine-rich protein	-1.09671	0.467581	10.1197	1112.59	-7.97476	4.46365e-05	0.00290074
258133_at	13233	AT3G24500	ATMBF1C/MBF1C (MULTIPROTEIN BRIDGING FACTOR 1C); DNA binding / transcription coactivator/ transcription factor	-1.09252	0.468942	7.67245	204.004	-13.5073	8.64913e-07	0.000243564
263063_s_at	18163	AT2G18150;AT2G18140	[AT2G18150, peroxidase, putative];[AT2G18140, peroxidase, putative]	-1.05181	0.482363	6.1234	69.7151	-8.48722	2.84392e-05	0.00225423
255595_at	10695	AT4G01700	chitinase family protein	-1.02468	0.49152	6.87894	117.697	-13.3777	9.31534e-07	0.000252956
262399_at	17499	AT1G49500	transcription initiation factor TFIID subunit 1b-like protein	-1.01969	0.493222	9.90826	960.914	-15.6213	2.80796e-07	0.00011861
261898_at	16998	AT1G80720	mitochondrial glycoprotein family protein / MAM33 family protein	-0.995524	0.501554	8.01077	257.918	-10.4867	5.93985e-06	0.000831215
257952_at	13052	AT3G21770	peroxidase 30 (PER30) (P30) (PRXR9)	-0.969634	0.510636	6.84749	115.159	-12.812	1.29811e-06	0.000299091
262229_at	17329	AT1G68620	alpha/beta-Hydrolases superfamily protein	-0.933288	0.523664	5.78863	55.2779	-7.75393	5.45997e-05	0.00330671
262319_s_at	17419	AT1G27580;AT1G27540	[AT1G27580, F-box family protein];[AT1G27540, F-box family protein]	-0.919255	0.528782	12.2467	4859.84	-15.3774	3.17316e-07	0.00012925
253971_at	9071	AT4G26530	Aldolase superfamily protein	-0.90335	0.534644	10.2748	1238.9	-15.2061	3.46138e-07	0.000136128
261782_at	16882	AT1G76110	high mobility group (HMG1/2) family protein / ARID/BRIGHT DNA-binding domain-containing protein	-0.869994	0.547149	6.82412	113.309	-10.4642	6.03659e-06	0.000834513
254017_at	9117	AT4G26170	ET1 (EFFECTOR OF TRANSCRIPTION 1)	-0.865265	0.548946	4.66536	25.3754	-8.15994	3.78269e-05	0.00257031
245197_at	297	AT1G67800	copine-related	-0.850979	0.554409	6.98586	126.751	-14.0397	6.42008e-07	0.000192687
263320_at	18420	AT2G47180	ATGOLS1 (ARABIDOPSIS THALIANA GALACTINOL SYNTHASE 1); transferase, transferring hexosyl groups	-0.840782	0.558341	7.74281	214.2	-9.07281	1.74485e-05	0.00169362
247092_at	2192	AT5G66380	ATFOLT1 (ARABIDOPSIS THALIANA FOLATE TRANSPORTER 1); binding / folic acid transporter	-0.836917	0.559839	7.93263	244.32	-12.0536	2.06973e-06	0.000430259
256889_at	11989	AT3G24010	ATING1 (ARABIDOPSIS THALIANA INHIBITOR OF GROWTH 1); PHD finger family protein	-0.828098	0.563271	9.50392	726.05	-14.7266	4.4373e-07	0.000155715
258323_at	13423	AT3G22750	protein kinase superfamily protein	-0.824375	0.564727	7.11039	138.179	-7.2902	8.46256e-05	0.00437712
260169_at	15269	AT1G71990	FUT13 (fucosyltransferase 13); fucosyltransferase/ transferase, transferring glycosyl groups	-0.821094	0.566013	8.1754	289.095	-12.0079	2.13051e-06	0.000437811
267497_at	22597	AT2G30540	ROXY7; CC-type glutaredoxin (ROXY) family protein	-0.817502	0.567423	8.74351	428.607	-11.8923	2.29347e-06	0.000448256
253253_at	8353	AT4G34750	SAUR49 (SMALL AUXIN UPREGULATED RNA 49)	-0.800225	0.574259	7.92179	242.492	-6.99048	0.000113637	0.00535314
264513_at	19613	AT1G09420	G6PD4 (GLUCOSE-6-PHOSPHATE DEHYDROGENASE 4); glucose-6-phosphate 1-dehydrogenase	-0.792012	0.577538	9.06917	537.144	-10.677	5.1885e-06	0.000773748
262748_at	17848	AT1G28610	GDSL-motif lipase family protein	-0.790535	0.57813	7.72939	212.217	-14.0496	6.38529e-07	0.000192687
259373_at	14473	AT1G69160	BGL1 (BIG GRAIN LIKE 1)	-0.786483	0.579756	6.99767	127.794	-5.44768	0.000610084	0.0164687
246705_x_at	1805	AT5G28120;AT5G28110	[AT5G28120, similar to unknown protein [Arabidopsis thaliana] (TAIR:AT5G28110.1)];[AT5G28110, similar to unknown protein [Arabidopsis thaliana] (TAIR:AT5G28120.1)]	-0.783414	0.58099	4.76472	27.1847	-8.92349	1.97127e-05	0.00182043
252102_at	7202	AT3G50970	LTI30/XERO2 (LOW TEMPERATURE-INDUCED 30)	-0.779854	0.582426	7.48282	178.877	-7.55258	6.58721e-05	0.00370084
251665_at	6765	AT3G57040	ARR9 (RESPONSE REGULATOR 4); transcription regulator	-0.775343	0.58425	7.80589	223.773	-8.74679	2.28256e-05	0.00202452
262947_at	18047	AT1G75750	GASA1 (GAST1 PROTEIN HOMOLOG 1)	-0.771063	0.585985	12.2258	4789.86	-10.4684	6.01841e-06	0.000834513
262986_at	18086	AT1G23390	KFB (KELCH DOMAIN-CONTAINING F-BOX PROTEIN)	-0.768499	0.587028	10.2445	1213.12	-14.9428	3.96357e-07	0.000146718
253161_at	8261	AT4G35770	SEN1 (DARK INDUCIBLE 1)	-0.767067	0.587611	10.4509	1399.73	-13.0976	1.09607e-06	0.000271329
246601_at	1701	AT1G31710	copper amine oxidase protein	-0.765098	0.588414	7.05228	132.724	-5.62883	0.000493149	0.014279
264610_at	19710	AT1G04645	plant self-incompatibility protein S1 family	-0.757891	0.59136	5.6682	50.8508	-4.58775	0.00178315	0.0334487
262322_at	17422	AT1G27590	similar to phosphatidylinositol 3- and 4-kinase family protein [Arabidopsis thaliana] (TAIR:AT1G27570.1); similar to Os07g0693900 [Oryza sativa (japonica cultivar-group)] (GB:NP_001060734.1); similar to PREDICTED: similar to Symplekin isoform 1 [Bos taurus] (GB:XP_585791.2); similar to PREDICTED: similar to Symplekin [Canis familiaris] (GB:XP_533638.2); contains domain ARM repeat (SSF48371); cont…	-0.753484	0.593169	7.2495	152.166	-10.1216	7.74735e-06	0.000976337
259843_at	14943	AT1G73570	HCP-like superfamily protein	-0.750311	0.594476	6.6051	97.3494	-10.858	4.57121e-06	0.000714173
261410_at	16510	AT1G07610	MT1C (metallothionein 1C)	-0.742343	0.597768	9.4112	680.854	-7.81301	5.17116e-05	0.00319123
261924_at	17024	AT1G22550	proton-dependent oligopeptide transport (POT) family protein	-0.737707	0.599692	7.45658	175.653	-6.09029	0.00029242	0.0101215
253305_at	8405	AT4G33666	hypothetical protein	-0.733175	0.601579	9.39719	674.275	-11.9093	2.26877e-06	0.000448256
247543_at	2643	AT5G61600	ERF104 (ETHYLENE RESPONSE FACTOR 104); AP2 domain transcription factor	-0.729511	0.603108	6.99094	127.199	-9.31182	1.44029e-05	0.00147987
264102_at	19202	AT1G79270	ECT8 (evolutionarily conserved C-terminal region 8)	-0.718639	0.60767	6.79705	111.203	-4.77581	0.00139761	0.0291137
263963_at	19063	AT2G36080	B3 DNA-binding domain transcription factor	-0.718526	0.607718	7.62462	197.351	-8.17307	3.73901e-05	0.00257031
253814_at	8914	AT4G28290	hypothetical protein	-0.717535	0.608136	6.90583	119.912	-7.17401	9.47644e-05	0.00478225
245392_at	492	AT4G15680	ROXY13; CC-type glutaredoxin (ROXY) family protein	-0.715925	0.608815	8.05816	266.53	-10.0246	8.32547e-06	0.00102651
257823_at	12923	AT3G25190	VTL5 (VACUOLAR IRON TRANSPORTER-LIKE 5)	-0.713532	0.609825	5.83154	56.9468	-5.77857	0.000414972	0.0128433
256914_at	12014	AT3G23880	F-box family protein	-0.711781	0.610566	8.07877	270.366	-10.2148	7.23371e-06	0.000938315
261205_at	16305	AT1G12790	DNA ligase-like protein	-0.70961	0.611485	6.9392	122.717	-9.45969	1.28178e-05	0.00139226
247474_at	2574	AT5G62280	DUF1442 family protein	-0.70777	0.612266	7.07969	135.269	-9.81978	9.71126e-06	0.00113017
262940_at	18040	AT1G79520	cation efflux family protein	-0.704087	0.613831	8.2654	307.704	-10.6601	5.2509e-06	0.00077673
258167_at	13267	AT3G21560	UGT84A2; UDP-glycosyltransferase/ sinapate 1-glucosyltransferase	-0.695104	0.617665	7.79056	221.407	-12.0497	2.0749e-06	0.000430259
252876_at	7976	AT4G39970	haloacid dehalogenase-like hydrolase family protein	-0.694496	0.617925	9.5755	762.977	-10.3624	6.49618e-06	0.000876792
245399_at	499	AT4G17340	DELTA-TIP2/TIP2;2 (tonoplast intrinsic protein 2;2); water channel	-0.693709	0.618262	7.01159	129.033	-5.92036	0.000353355	0.0115473
255331_at	10431	AT4G04330	RBCX1 (HOMOLOGUE OF CYANOBACTERIAL RBCX 1)	-0.689967	0.619868	9.23919	604.328	-9.98714	8.56139e-06	0.00103875
265817_at	20917	AT2G18050	HIS1-3 (HISTONE H1-3); DNA binding	-0.681332	0.623589	6.00812	64.3611	-6.3641	0.000217172	0.00816095
257035_at	12135	AT3G19270	CYP707A4 (cytochrome P450, family 707, subfamily A, polypeptide 4); oxygen binding	-0.675913	0.625936	6.23903	75.5329	-5.25902	0.000765062	0.0193901
253125_at	8225	AT4G36040	DJC23 (DNA J PROTEIN C23); DNAJ heat shock N-terminal domain-containing protein (J11)	-0.670731	0.628188	12.3747	5310.65	-12.7137	1.37702e-06	0.000314098
258179_at	13279	AT3G21690	MATE efflux family protein	-0.649257	0.637609	8.61709	392.647	-10.9478	4.29586e-06	0.000697639
248350_at	3450	AT5G52160	protease inhibitor/seed storage/lipid transfer protein (LTP) family protein	-0.642453	0.640623	7.28604	156.069	-4.11798	0.00335251	0.049713
251778_at	6878	AT3G55660	ATROPGEF6/ROPGEF6 (KINASE PARTNER PROTEIN-LIKE); Rho guanyl-nucleotide exchange factor	-0.642387	0.640652	6.9522	123.829	-8.77704	2.22559e-05	0.00198303
256589_at	11689	AT3G28740	cytochrome P450 family protein	-0.635354	0.643783	8.05362	265.693	-6.41529	0.00020563	0.00786982
245646_x_at	746	AT1G25112;AT1G24851;AT1G25025;AT1G25180	[AT1G25112, similar to unknown protein [Arabidopsis thaliana] (TAIR:AT1G25025.1); similar to unknown protein [Arabidopsis thaliana] (TAIR:AT1G25180.1); similar to PREDICTED: hypothetical protein [Homo sapiens] (GB:XP_001129546.1)];[AT1G24851, similar to unknown protein [Arabidopsis thaliana] (TAIR:AT1G25112.1); similar to unknown protein [Arabidopsis thaliana] (TAIR:AT1G25025.1); similar to unkno…	-0.633749	0.644499	5.29731	39.3232	-8.11121	3.94996e-05	0.00266564
253472_at	8572	AT4G32230	ATP binding / protein kinase	-0.626081	0.647934	4.76764	27.2398	-6.92148	0.000121779	0.00556669
257460_at	12560	AT1G75580	auxin-responsive protein	-0.621201	0.65013	9.03373	524.113	-7.4763	7.07985e-05	0.00386343
263231_at	18331	AT1G05680	UDP-glucoronosyl/UDP-glucosyl transferase family protein	-0.612823	0.653916	8.20559	295.208	-8.33962	3.2307e-05	0.00236193
247754_at	2854	AT5G59080	similar to unknown protein [Arabidopsis thaliana] (TAIR:AT5G02020.1)	-0.606759	0.65667	6.10282	68.7277	-8.80614	2.17228e-05	0.00194651
259441_at	14541	AT1G02300	cathepsin B-like cysteine protease	-0.595413	0.661855	9.49924	723.695	-9.45259	1.28893e-05	0.00139339
252250_at	7350	AT3G49790	similar to ATPP2-A10 (Phloem protein 2-A10) [Arabidopsis thaliana] (TAIR:AT1G10150.1); similar to hypothetical protein [Oryza sativa (japonica cultivar-group)] (GB:AAT85053.1); similar to Os03g0769900 [Oryza sativa (japonica cultivar-group)] (GB:NP_001051400.1); similar to expressed protein [Oryza sativa (japonica cultivar-group)] (GB:AAR87321.1); contains domain FAMILY NOT NAMED (PTHR21477); con…	-0.587043	0.665706	6.97821	126.081	-6.74236	0.000146099	0.00622902
260831_at	15931	AT1G06830	ROXY6; CC-type glutaredoxin (ROXY) family protein	-0.586317	0.666041	6.86264	116.376	-5.25961	0.000764506	0.0193901
256299_at	11399	AT1G69530	ATEXPA1 (ARABIDOPSIS THALIANA EXPANSIN A1)	0.585516	1.50058	10.2265	1198.07	9.18196	1.59766e-05	0.00159138
253475_at	8575	AT4G32290	Core-2/I-branching beta-1,6-N-acetylglucosaminyltransferase family protein	0.585918	1.50099	8.75364	431.627	8.71229	2.34952e-05	0.00204037
245697_at	797	AT5G04200	latex-abundant protein, putative (AMC9) / caspase family protein	0.587286	1.50242	6.44418	87.0749	8.38617	3.10275e-05	0.00233177
254078_at	9178	AT4G25710	kelch repeat-containing F-box family protein	0.589513	1.50474	7.68025	205.109	6.77878	0.000140749	0.00612689
264873_at	19973	AT1G24100	UGT74B1 (UDP-glucosyl transferase 74B1); UDP-glycosyltransferase/ thiohydroximate beta-D-glucosyltransferase/ transferase, transferring glycosyl groups	0.58976	1.505	9.99266	1018.8	9.65564	1.10089e-05	0.00123701
245196_at	296	AT1G67750	pectate lyase family protein	0.590382	1.50564	10.8697	1871.19	9.90516	9.10445e-06	0.00107048
255957_at	11057	AT1G22160	senescence-associated protein-related	0.59139	1.5067	10.187	1165.73	10.1606	7.52776e-06	0.000959264
257102_at	12202	AT3G25050	XTH3 (XYLOGLUCAN ENDOTRANSGLUCOSYLASE/HYDROLASE 3); hydrolase, acting on glycosyl bonds	0.591538	1.50685	11.8595	3716.02	7.29753	8.4027e-05	0.0043721
260074_at	15174	AT1G73640	AtRABA6a (Arabidopsis Rab GTPase homolog A6a); GTP binding	0.592493	1.50785	7.37477	165.969	6.92515	0.00012133	0.00555731
258889_at	13989	AT3G05610	invertase/pectin methylesterase inhibitor superfamily protein	0.593297	1.50869	5.65883	50.5215	4.34151	0.00247253	0.0414476
253174_at	8274	AT4G35090	CAT2 (CATALASE 2); catalase	0.593654	1.50906	11.4265	2752.46	7.13316	9.86437e-05	0.0049128
258809_at	13909	AT3G04070	ANAC047 (Arabidopsis NAC domain containing protein 47); transcription factor	0.597492	1.51308	6.51173	91.2486	5.17395	0.000848637	0.0208368
262939_s_at	18039	AT1G79530;AT1G16300	[AT1G79530, GAPCP-1; glyceraldehyde-3-phosphate dehydrogenase];[AT1G16300, GAPCP-2; glyceraldehyde-3-phosphate dehydrogenase]	0.597755	1.51336	9.03994	526.372	10.7592	4.89744e-06	0.000742851
253101_at	8201	AT4G37430;AT4G37432	[AT4G37430, CYP81F1 (CYTOCHROME P450 MONOOXYGENASE 81A1); oxygen binding]	0.598128	1.51375	9.27365	618.939	8.88052	2.04236e-05	0.00187094
254040_at	9140	AT4G25900	aldose 1-epimerase family protein	0.602547	1.5184	8.83091	455.376	9.70854	1.05706e-05	0.00119815
245436_at	536	AT4G16620	integral membrane family protein / nodulin MtN21-related	0.602911	1.51878	7.52653	184.378	7.96271	4.5125e-05	0.00291075
261032_at	16132	AT1G17430	hydrolase, alpha/beta fold family protein	0.602937	1.51881	8.0017	256.302	8.22616	3.56792e-05	0.00250446
264496_at	19596	AT1G27285	copia-like retrotransposon family	0.603586	1.51949	4.86722	29.1863	8.48174	2.85734e-05	0.00225423
267414_at	22514	AT2G34790	EDA28/MEE23 (embryo sac development arrest 28, maternal effect embryo arrest 23); electron carrier	0.605124	1.52111	7.32367	160.193	6.11001	0.000286134	0.00997968
253346_at	8446	AT4G33600	transmembrane protein; similar to unknown protein [Arabidopsis thaliana] (TAIR:AT4G33590.1); similar to Os09g0466800 [Oryza sativa (japonica cultivar-group)] (GB:NP_001063420.1)	0.605133	1.52112	5.52206	45.9521	4.69456	0.00155174	0.0307784
265133_s_at	20233	AT1G51240;AT1G51250	plant self-incompatibility protein S1 family	0.606373	1.52243	4.52205	22.976	8.33007	3.25769e-05	0.00237278
258940_at	14040	AT3G09930	GDSL-motif lipase/hydrolase family protein	0.606665	1.52273	4.86397	29.1206	6.66951	0.000157488	0.00652456
257262_at	12362	AT3G21890	BBX31 (B-BOX DOMAIN PROTEIN 31) zinc finger protein	0.608253	1.52441	6.25305	76.2703	7.74069	5.5271e-05	0.00332647
251228_at	6328	AT3G62710	glycosyl hydrolase family 3 protein	0.609547	1.52578	6.00014	64.0061	5.88027	0.000369688	0.0119442
260772_at	15872	AT1G49050	aspartyl protease family protein	0.610034	1.5263	7.86893	233.767	8.39446	3.08057e-05	0.00232675
258321_at	13421	AT3G22840	ELIP1 (EARLY LIGHT-INDUCABLE PROTEIN); chlorophyll binding	0.611117	1.52744	9.70351	833.77	4.46936	0.00208427	0.0370555
267076_at	22176	AT2G41090	CML10 (CALMODULIN LIKE 10)	0.611192	1.52752	10.6338	1588.92	9.1199	1.67957e-05	0.00165565
265058_s_at	20158	AT1G52030;AT1G52040	[AT1G52030, MBP2 (MYROSINASE-BINDING PROTEIN 2)];[AT1G52040, MBP1 (MYROSINASE-BINDING PROTEIN 1)]	0.614915	1.53147	12.6696	6515.36	10.9557	4.27233e-06	0.000697639
267476_at	22576	AT2G02720	pectate lyase family protein	0.616883	1.53356	4.97371	31.4221	5.8127	0.00039913	0.0125125
245208_at	308	AT5G12330	LRP1 (LATERAL ROOT PRIMORDIUM 1)	0.618995	1.53581	6.9499	123.631	6.45927	0.000196252	0.00760017
263539_at	18639	AT2G24850	TAT3 (TYROSINE AMINOTRANSFERASE 3); transaminase	0.621227	1.53818	5.1068	34.4587	5.41783	0.000632122	0.016805
256913_at	12013	AT3G23870	ENOR3L2; magnesium transporter NIPA	0.621446	1.53842	5.58473	47.9923	4.19135	0.00303121	0.0468441
259197_at	14297	AT3G03670	peroxidase superfamily protein	0.623159	1.54024	6.12329	69.7096	8.9267	1.96608e-05	0.00182043
262454_at	17554	AT1G11190	BFN1 (BIFUNCTIONAL NUCLEASE I); nucleic acid binding	0.624809	1.54201	8.75903	433.241	6.77466	0.000141343	0.00613825
245700_at	800	AT5G04180	ACA3 (ALPHA CARBONIC ANHYDRASE 3); carbonic anhydrase family protein	0.627074	1.54443	6.1048	68.8222	4.70093	0.00153902	0.0307322
262381_at	17481	AT1G72900	Toll-Interleukin-Resistance (TIR) domain-containing protein	0.628132	1.54556	4.9986	31.9689	4.85131	0.00126922	0.0272972
259252_at	14352	AT3G07610	IBM1, INCREASE IN BONSAI METHYLATION 1	0.62888	1.54636	6.18505	72.7586	5.23862	0.000784248	0.0196097
251590_at	6690	AT3G57690	AGP23 (ARABINOGALACTAN-PROTEIN 23)	0.629001	1.54649	10.5482	1497.33	5.81518	0.000398007	0.0125049
255479_at	10579	AT4G02380	SAG21 (SENESCENCE-ASSOCIATED GENE 21)	0.632066	1.54978	7.86373	232.927	5.72111	0.000443234	0.0132332
252004_at	7104	AT3G52780	ATPAP20/PAP20; acid phosphatase/ protein serine/threonine phosphatase	0.632121	1.54984	7.08143	135.432	6.66938	0.000157511	0.00652456
262736_at	17836	AT1G28570	SGNH hydrolase-type esterase superfamily protein	0.633508	1.55133	8.22067	298.311	5.58281	0.000520323	0.0148916
258135_at	13235	AT3G24506	similar to unknown protein [Arabidopsis thaliana] (TAIR:AT2G17240.1); similar to conserved hypothetical protein [Medicago truncatula] (GB:ABE77731.1)	0.633545	1.55137	6.99314	127.393	7.89094	4.81583e-05	0.00303451
249375_at	4475	AT5G40730	AGP24 (ARABINOGALACTAN PROTEIN 24)	0.633928	1.55178	10.1395	1128	5.07172	0.000962528	0.0227955
248619_at	3719	AT5G49630	AAP6 (AMINO ACID PERMEASE 6); amino acid permease	0.635328	1.55329	9.46308	705.784	8.73197	2.31105e-05	0.00202888
256335_at	11435	AT1G72110	O-acyltransferase (WSD1-like) family protein	0.636726	1.5548	5.11472	34.6486	6.88796	0.000125966	0.00567585
252733_at	7833	AT3G43120	SAUR39 (SMALL AUXIN UPREGULATED RNA 39)	0.638541	1.55675	5.53558	46.3847	5.08769	0.000943692	0.0224693
259616_at	14716	AT1G47960	C/VIF1 (CELL WALL / VACUOLAR INHIBITOR OF FRUCTOSIDASE 1); pectinesterase inhibitor	0.638846	1.55708	5.64533	50.0512	5.25252	0.000771112	0.0194569
266545_at	21645	AT2G35290	SAUR79 (SMALL AUXIN UPREGULATED RNA 79)	0.638996	1.55724	6.85979	116.145	9.54727	1.19712e-05	0.0013128
257862_s_at	12962	AT3G17760;AT3G17720	[AT3G17760, glutamate decarboxylase, putative];[AT3G17720, pyridoxal-dependent decarboxylase family protein]	0.640287	1.55864	6.72109	105.499	6.28673	0.000236001	0.00866857
258318_at	13418	AT3G22680	RDM1 (RNA-DIRECTED DNA METHYLATION 1)	0.646897	1.5658	8.19306	292.656	12.4657	1.60113e-06	0.000351172
258077_at	13177	AT3G26110	anther-specific protein agp1-like protein	0.647142	1.56606	6.78536	110.306	4.27547	0.00270316	0.0435616
246967_at	2067	AT5G24860	FPF1 (FLOWERING PROMOTING FACTOR 1)	0.648132	1.56714	5.7376	53.3567	7.80601	5.20445e-05	0.00319123
253846_at	8946	AT4G28000	AAA-type ATPase family protein	0.649134	1.56823	5.23893	37.7637	10.7533	4.9176e-06	0.000742851
263384_at	18484	AT2G40130	SMXL8 (SMAX1-LIKE 8); chaperonin	0.649544	1.56867	6.13837	70.4421	4.88742	0.00121241	0.0267313
264899_at	19999	AT1G23130	polyketide cyclase/dehydrase and lipid transport superfamily protein	0.651012	1.57027	9.96185	997.274	8.74295	2.2899e-05	0.00202452
264184_at	19284	AT1G54790	GDSL-motif lipase/hydrolase family protein	0.65418	1.57372	5.80024	55.7245	9.9645	8.70765e-06	0.00105091
253173_at	8273	AT4G35110	PEARLI 4 (PHOSPHOLIPASE-LIKE PROTEIN 4)	0.657246	1.57707	8.28172	311.206	8.35335	3.19235e-05	0.00235983
252879_at	7979	AT4G39390	NST-K1 (NUCLEOTIDE SUGAR TRANSPORTER-KT 1)	0.657439	1.57728	8.40266	338.417	8.97747	1.88586e-05	0.00177022
265163_at	20263	AT1G23580	transmembrane protein	0.658095	1.578	6.0274	65.2273	4.52923	0.00192563	0.0352747
246216_at	1316	AT4G36380	ROT3 (ROTUNDIFOLIA 3); oxygen binding / steroid hydroxylase	0.658791	1.57876	7.78168	220.049	6.55666	0.000177121	0.00703857
248037_at	3137	AT5G55930	ATOPT1 (oligopeptide transporter 1); oligopeptide transporter	0.659486	1.57952	8.35328	327.03	11.2884	3.4073e-06	0.00059785
247758_at	2858	AT5G59120	subtilase family protein	0.662203	1.5825	10.6887	1650.56	4.60811	0.0017363	0.0330042
258424_at	13524	AT3G16750	similar to shell matrix protein [Pinctada fucata] (GB:BAD00044.1)	0.66254	1.58287	4.73025	26.5428	7.52651	6.75115e-05	0.00375595
249346_at	4446	AT5G40780	LHT1 (LYSINE HISTIDINE TRANSPORTER 1); amino acid permease/ amino acid transporter	0.662912	1.58328	7.90943	240.424	11.0456	4.01679e-06	0.000673698
260158_at	15258	AT1G79910	DUF292 protein	0.667101	1.58788	5.50431	45.3903	5.04076	0.00100024	0.0235212
257678_at	12778	AT3G20420	RTL2 (RNASE THREE-LIKE PROTEIN 2); double-stranded RNA binding / ribonuclease III	0.668907	1.58987	5.40308	42.3145	9.60598	1.14387e-05	0.00127276
254332_at	9432	AT4G22730	leucine-rich repeat transmembrane protein kinase, putative	0.670214	1.59131	8.01456	258.597	10.5368	5.73103e-06	0.000811955
253506_at	8606	AT4G31980	PPPDE thiol peptidase family protein	0.670743	1.59189	6.18547	72.7798	7.21657	9.09024e-05	0.00464907
249125_at	4225	AT5G43450	2-oxoglutarate-dependent dioxygenase, putative	0.671278	1.59248	7.30517	158.152	7.32855	8.15474e-05	0.00431577
259055_at	14155	AT3G03340	UNE6 (unfertilized embryo sac 6)	0.672254	1.59356	9.15507	570.1	7.11282	0.00010064	0.0049745
252061_at	7161	AT3G52620	transmembrane protein	0.673182	1.59459	5.31847	39.9043	8.55608	2.68133e-05	0.00217656
261890_at	16990	AT1G80970	XH domain-containing protein	0.673568	1.59501	5.53584	46.3932	5.38889	0.000654329	0.0172347
263158_at	18258	AT1G54160	NF-YA5 (NUCLEAR FACTOR Y, SUBUNIT A5); CCAAT-binding transcription factor (CBF-B/NF-YA) family protein	0.67616	1.59788	7.33356	161.295	10.4087	6.28241e-06	0.000858095
253800_at	8900	AT4G28160	hydroxyproline-rich glycoprotein family protein	0.677641	1.59952	7.36355	164.684	7.15558	9.64926e-05	0.00485871
257579_at	12679	AT3G11000	DCD (Development and Cell Death) domain protein	0.67766	1.59954	6.27712	77.5536	4.65392	0.00163571	0.0318077
260189_at	15289	AT1G67550	URE (UREASE); urease	0.678551	1.60053	5.89944	59.6911	8.45116	2.93342e-05	0.00228386
253298_at	8398	AT4G33560	WIP5 (WOUND-INDUCED POLYPEPTIDE 5)	0.679211	1.60126	5.76697	54.4542	10.8648	4.54963e-06	0.000714173
263689_at	18789	AT1G26820	RNS3 (RIBONUCLEASE 3); endoribonuclease	0.68028	1.60245	9.39259	672.129	8.24944	3.49566e-05	0.00248397
260355_at	15455	AT1G69180	CRC (CRABS CLAW); transcription factor	0.682949	1.60542	9.0852	543.148	13.2971	9.75844e-07	0.000255851
258035_at	13135	AT3G21180	ACA9 (autoinhibited Ca2+ -ATPase 9); calcium-transporting ATPase/ calmodulin binding	0.68472	1.60739	6.67602	102.254	9.31963	1.4314e-05	0.00147987
260420_at	15520	AT1G69610	zinc finger FYVE domain protein	0.686108	1.60894	5.03562	32.7999	7.10393	0.000101527	0.00498532
247736_at	2836	AT5G59370	ACT4 (ACTIN 4)	0.688682	1.61181	6.56615	94.7566	6.86196	0.000129324	0.00578407
257691_at	12791	AT3G12660	fasciclin-like arabinogalactan family protein	0.689262	1.61246	4.96173	31.1624	8.54928	2.69691e-05	0.00218144
267571_at	22671	AT2G30650	ATP-dependent caseinolytic (Clp) protease/crotonase family protein	0.6896	1.61284	5.56814	47.4435	7.53987	6.66661e-05	0.00372027
266918_at	22018	AT2G45800	PLIM2A; LIM domain-containing protein	0.690138	1.61344	5.78822	55.2621	4.58326	0.00179365	0.0335905
262022_at	17122	AT1G35490	bZIP family transcription factor	0.690215	1.61352	4.94225	30.7443	7.95051	4.56253e-05	0.00292335
260153_at	15253	AT1G52760	esterase/lipase/thioesterase family protein	0.690522	1.61387	9.32221	640.125	12.9959	1.16369e-06	0.00027752
253993_at	9093	AT4G26070	MEK1 (mitogen-activated protein kinase kinase 1); MAP kinase kinase/ kinase	0.692081	1.61561	7.34522	162.604	7.61345	6.22128e-05	0.00360171
259272_at	14372	AT3G01290	HIR2 (HYPERSENSITIVE INDUCED REACTION 2); band 7 family protein	0.694445	1.61826	5.72205	52.7848	9.0768	1.73921e-05	0.00169362
251012_at	6112	AT5G02580	argininosuccinate lyase protein	0.69629	1.62033	7.55247	187.724	5.42177	0.00062917	0.0167461
262366_at	17466	AT1G72890	disease resistance protein (TIR-NBS class)	0.697374	1.62155	5.43449	43.2457	6.9299	0.000120752	0.00554195
250286_at	5386	AT5G13320	PBS3 (AVRPPHB SUSCEPTIBLE 3)	0.699773	1.62425	6.96762	125.159	9.70363	1.06105e-05	0.00119815
252052_at	7152	AT3G52600	ATCWINV2 (ARABIDOPSIS THALIANA CELL WALL INVERTASE 2); hydrolase, hydrolyzing O-glycosyl compounds	0.703247	1.62816	5.42026	42.8213	5.82964	0.000391514	0.012428
257960_at	13060	AT3G25570	adenosylmethionine decarboxylase family protein	0.703456	1.6284	5.97553	62.9236	11.6516	2.67949e-06	0.000492896
253422_at	8522	AT4G32240	hypothetical protein	0.703634	1.6286	8.52492	368.348	10.6487	5.29328e-06	0.00077673
250514_at	5614	AT5G09550	RAB GDP-dissociation inhibitor	0.715662	1.64224	8.13091	280.316	4.64912	0.00164593	0.0319249
263588_s_at	18688	AT2G25330;AT2G25320	[AT2G25330, meprin and TRAF homology domain-containing protein / MATH domain-containing protein];[AT2G25320, similar to meprin and TRAF homology domain-containing protein / MATH domain-containing protein [Arabidopsis thaliana] (TAIR:AT2G25330.1); similar to unknown [Populus trichocarpa] (GB:ABG37643.1); similar to unknown [Populus trichocarpa] (GB:ABG37644.1); similar to MATH [Medicago truncatula…	0.722509	1.65005	5.8588	58.0331	8.52444	2.75471e-05	0.00222032
261015_at	16115	AT1G26480	GRF12 (GENERAL REGULATORY FACTOR 12); protein phosphorylated amino acid binding	0.725527	1.6535	6.83121	113.868	4.62819	0.0016914	0.0323936
245420_at	520	AT4G17410	PQT3 nuclear localized E3 ligase	0.727017	1.65521	6.30704	79.1784	11.8042	2.42706e-06	0.000457531
261886_s_at	16986	AT1G80700;AT1G80980	[AT1G80700, stress response NST1-like protein];[AT1G80980, similar to unknown protein [Arabidopsis thaliana] (TAIR:AT1G80700.1); similar to hypothetical protein MtrDRAFT_AC152405g48v1 [Medicago truncatula] (GB:ABE86215.1)]	0.727762	1.65607	9.10352	550.09	6.26457	0.00024172	0.00883251
259681_at	14781	AT1G77760	NIA1 (NITRATE REDUCTASE 1)	0.727769	1.65608	9.39081	671.297	6.71568	0.000150161	0.00631633
245329_at	429	AT4G14365	XBAT34 (XB3 ORTHOLOG 4 IN ARABIDOPSIS THALIANA); zinc finger (C3HC4-type RING finger) family protein / ankyrin repeat family protein	0.728497	1.65691	5.36146	41.1112	7.9584	4.5301e-05	0.00291075
252140_at	7240	AT3G51070	S-adenosyl-L-methionine-dependent methyltransferases superfamily protein	0.729085	1.65759	4.9649	31.2309	5.77117	0.000418501	0.0129175
257057_at	12157	AT3G15310	transposable element gene	0.730743	1.65949	4.97034	31.3488	10.9422	4.31246e-06	0.000697639
258686_at	13786	AT3G07840	polygalacturonase, putative / pectinase, putative	0.731718	1.66062	5.99189	63.6413	4.82511	0.00131226	0.0279483
266693_at	21793	AT2G19800	MIOX2 (MYO-INOSITOL OXYGENASE 2)	0.742698	1.6733	7.83121	227.735	10.0018	8.46813e-06	0.00103766
266115_at	21215	AT2G02140	LCR72/PDF2.6 (Low-molecular-weight cysteine-rich 72); protease inhibitor	0.743056	1.67372	5.47862	44.5892	4.49963	0.00200236	0.0360675
245731_at	831	AT1G73500	ATMKK9 (Arabidopsis thaliana MAP kinase kinase 9); kinase	0.744998	1.67597	7.62589	197.524	11.8884	2.29925e-06	0.000448256
257635_at	12735	AT3G26280	CYP71B4 (cytochrome P450, family 71, subfamily B, polypeptide 4); oxygen binding	0.745674	1.67676	4.94767	30.8601	10.0694	8.05227e-06	0.00100919
261934_at	17034	AT1G22400	UGT85A1 (UDP-glucosyl transferase 85A1); UDP-glycosyltransferase/ transferase, transferring glycosyl groups / transferase, transferring hexosyl groups	0.745759	1.67686	7.17302	144.309	8.14808	3.82266e-05	0.00258738
267449_at	22549	AT2G33690	late embryogenesis abundant protein, group 6	0.746362	1.67756	5.92386	60.71	4.90784	0.00118152	0.0261801
256497_at	11597	AT1G31580	ECS1 cell wall protein	0.749747	1.6815	7.31027	158.713	10.2879	6.85726e-06	0.000909385
256866_at	11966	AT3G26380	glycosyl hydrolase family protein 27 / alpha-galactosidase family protein / melibiase family protein	0.75473	1.68732	9.16062	572.299	14.9373	3.975e-07	0.000146718
262378_at	17478	AT1G72830	HAP2C (Heme activator protein (yeast) homolog 2C); transcription factor	0.754986	1.68762	6.69639	103.709	8.10275	3.97983e-05	0.00267787
255284_at	10384	AT4G04610	APR1 (PAPS REDUCTASE HOMOLOG 19)	0.755885	1.68867	8.42603	343.943	10.9856	4.18553e-06	0.000691826
264898_at	19998	AT1G23205	invertase/pectin methylesterase inhibitor family protein	0.756485	1.68937	9.17136	576.573	8.85654	2.08328e-05	0.00189321
255773_at	10873	AT1G18590	SOT17; sulfotransferase family protein	0.756569	1.68947	7.70026	207.974	6.06076	0.00030212	0.0103275
263034_at	18134	AT1G24020	Bet v I allergen family protein	0.758797	1.69208	13.8955	15238.9	14.632	4.66447e-07	0.000161207
258137_at	13237	AT3G24515	UBC37 (ubiquitin-conjugating enzyme 34); ubiquitin-protein ligase	0.75906	1.69239	5.55095	46.8816	13.2648	9.94267e-07	0.000257718
253008_at	8108	AT4G38210	ATEXPA20 (ARABIDOPSIS THALIANA EXPANSIN A20)	0.75908	1.69241	7.93413	244.574	8.62648	2.52575e-05	0.0021181
265405_at	20505	AT2G16750	kinase with adenine nucleotide alpha hydrolases-like domain-containing protein	0.759141	1.69248	8.16138	286.298	5.52916	0.0005541	0.015489
264953_at	20053	AT1G77120	ADH1 (ALCOHOL DEHYDROGENASE 1); alcohol dehydrogenase	0.761862	1.69568	8.11283	276.825	14.8969	4.05914e-07	0.000146967
264830_at	19930	AT1G03710	cystatin/monellin superfamily protein	0.763425	1.69752	8.81783	451.264	13.9621	6.70082e-07	0.000195956
247253_at	2353	AT5G64790	glycosyl hydrolase family 17 protein	0.764308	1.69856	6.29189	78.3517	7.50856	6.86671e-05	0.00378333
250558_at	5658	AT5G07990	TT7 (TRANSPARENT TESTA 7); flavonoid 3'-monooxygenase/ oxygen binding	0.766719	1.7014	9.53264	740.648	9.42773	1.31431e-05	0.00140091
255530_at	10630	AT4G02140	similar to unknown protein [Arabidopsis thaliana] (TAIR:AT1G02700.1)	0.768596	1.70361	7.0836	135.636	7.57203	6.46773e-05	0.00369794
265922_at	21022	AT2G18480	major facilitator superfamily protein	0.77211	1.70777	7.13341	140.401	4.11827	0.00335114	0.049713
248932_at	4032	AT5G46050	ATPTR3/PTR3 (PEPTIDE TRANSPORTER PROTEIN 3); transporter	0.772946	1.70876	6.94863	123.523	8.41202	3.03412e-05	0.00231518
245528_at	628	AT4G15530	PPDK (PYRUVATE ORTHOPHOSPHATE DIKINASE); kinase/ pyruvate, phosphate dikinase	0.777843	1.71456	8.06574	267.935	6.06027	0.000302284	0.0103275
246075_at	1175	AT5G20410	MGD2 (monogalactosyldiacylglycerol synthase 2); 1,2-diacylglycerol 3-beta-galactosyltransferase/ transferase, transferring glycosyl groups	0.778666	1.71554	6.40098	84.5057	7.19868	9.25041e-05	0.00469937
252937_at	8037	AT4G39180	SEC14 (secretion 14)	0.782148	1.71969	5.17992	36.2502	11.4126	3.13606e-06	0.000558856
254104_at	9204	AT4G25040	integral membrane family protein	0.782522	1.72014	9.09473	546.749	4.63505	0.00167635	0.0322408
258063_at	13163	AT3G14620	CYP72A8 (cytochrome P450, family 72, subfamily A, polypeptide 8); oxygen binding	0.790336	1.72948	6.95539	124.103	4.37111	0.00237614	0.0402673
258095_at	13195	AT3G23610	dual specificity protein phosphatase (DsPTP1)	0.791012	1.73029	6.17644	72.3259	7.64786	6.02449e-05	0.00352355
250475_at	5575	AT5G10180	AST68 (Sulfate transporter 2.1)	0.791869	1.73132	7.36585	164.946	7.46737	7.14015e-05	0.00387778
260097_at	15197	AT1G73220	sugar transporter family protein	0.792163	1.73167	9.1623	572.963	5.94184	0.000344931	0.0113697
248534_at	3634	AT5G50030	invertase/pectin methylesterase inhibitor family protein	0.798846	1.73971	8.42455	343.591	5.789	0.000410058	0.0127707
248062_at	3162	AT5G55450	protease inhibitor/seed storage/lipid transfer protein (LTP) family protein	0.800615	1.74184	9.73221	850.522	8.29154	3.36907e-05	0.00242674
249783_at	4883	AT5G24270	SOS3 (SALT OVERLY SENSITIVE 3)	0.803092	1.74484	6.33468	80.7102	4.57096	0.00182281	0.0339844
253548_at	8648	AT4G30993	calcineurin-like metallo-phosphoesterase superfamily protein	0.805475	1.74772	8.40928	339.974	13.0904	1.10072e-06	0.000271329
246545_at	1645	AT5G15110	pectate lyase family protein	0.806802	1.74933	5.74619	53.6754	5.48281	0.000585219	0.0161608
261942_at	17042	AT1G22590	AGL87 (AGAMOUS-LIKE 87); MADS-box family protein	0.809826	1.753	7.62057	196.798	11.7615	2.49488e-06	0.000462669
258058_at	13158	AT3G28980	mediator of RNA polymerase II transcription subunit-like protein	0.810188	1.75344	9.67874	819.577	4.97602	0.00108443	0.0248103
260140_at	15240	AT1G66390	PAP2 (PRODUCTION OF ANTHOCYANIN PIGMENT 2); MYB DNA binding / transcription factor	0.815678	1.76013	5.4869	44.8456	10.6437	5.31214e-06	0.00077673
258890_at	13990	AT3G05690	HAP2B (Heme activator protein (yeast) homolog 2B, unfertilized embryo sac 8); transcription factor	0.815758	1.76022	6.70772	104.526	8.08676	4.03697e-05	0.00270833
257726_at	12826	AT3G18360	VQ motif-containing protein	0.821238	1.76692	7.06052	133.483	4.86004	0.00125523	0.0271692
254024_at	9124	AT4G25780	ATCAPE2	0.823216	1.76935	6.70023	103.985	7.66354	5.9371e-05	0.00349453
253382_at	8482	AT4G33040	glutaredoxin family protein	0.826144	1.77294	8.48695	358.78	9.95385	8.77742e-06	0.00105098
266488_at	21588	AT2G47670	invertase/pectin methylesterase inhibitor family protein	0.827481	1.77458	5.71116	52.388	5.55734	0.000536069	0.0152288
245820_at	920	AT1G26320	zinc-binding dehydrogenase family protein	0.830801	1.77867	5.89825	59.6415	6.34869	0.000220786	0.00826951
254123_at	9223	AT4G24640	APPB1; pectinesterase inhibitor	0.831306	1.7793	5.32339	40.0406	4.60399	0.00174567	0.0331271
264016_at	19116	AT2G21220	SAUR12 (SMALL AUXIN UPREGULATED RNA 12)	0.831748	1.77984	9.43069	690.116	7.02603	0.000109678	0.00524475
257815_at	12915	AT3G25130	acidic leucine-rich nuclear phosphoprotein 32 family B protein	0.832609	1.7809	6.30247	78.928	8.59365	2.59702e-05	0.00213086
256829_at	11929	AT3G22850	aluminum induced protein with YGL and LRDR motifs	0.838429	1.7881	8.27386	309.515	9.59065	1.15751e-05	0.00128169
258134_at	13234	AT3G24530	AAA-type ATPase family protein / ankyrin repeat family protein	0.839308	1.78919	7.2071	147.759	12.6268	1.45123e-06	0.000327749
262118_at	17218	AT1G02850	glycosyl hydrolase family 1 protein	0.839424	1.78934	8.71023	418.834	9.80852	9.7946e-06	0.00113409
256588_at	11688	AT3G28790	transmembrane protein	0.841967	1.79249	9.90133	956.308	7.40036	7.61127e-05	0.00406559
254572_at	9672	AT4G19380	long-chain fatty alcohol dehydrogenase family protein	0.843746	1.7947	6.75211	107.792	8.43067	2.98568e-05	0.00229304
245778_at	878	AT1G73530	ORRM6 (ORGANELLE RNA RECOGNITION MOTIF PROTEIN 6); RNA recognition motif (RRM)-containing protein	0.844349	1.79545	7.78763	220.958	12.9871	1.1697e-06	0.00027752
265552_at	20652	AT2G07560	AHA6 (ARABIDOPSIS H(+)-ATPASE 6); ATPase	0.844404	1.79552	9.31512	636.986	6.74294	0.000146012	0.00622902
256617_at	11717	AT3G22240	THCYSTM9 (CYSTEINE-RICH TRANSMEMBRANE MODULE 9)	0.852971	1.80622	8.72075	421.898	8.4678	2.89174e-05	0.00226669
245306_at	406	AT4G14690	ELIP2 (EARLY LIGHT-INDUCIBLE PROTEIN 2); chlorophyll binding	0.857304	1.81165	8.72441	422.97	7.51317	6.83681e-05	0.00377801
263073_at	18173	AT2G17500	PILS5 (PIN-LIKES 5); auxin efflux carrier family protein	0.863045	1.81887	7.07483	134.815	10.7682	4.86682e-06	0.000742851
265404_at	20504	AT2G16730	BGAL13 (beta-galactosidase 13); beta-galactosidase	0.864128	1.82024	5.01712	32.382	4.37252	0.00237166	0.0402212
251825_at	6925	AT3G55100	ABC transporter family protein	0.864281	1.82043	5.99894	63.9531	5.55611	0.000536845	0.0152306
260077_at	15177	AT1G73620	pathogenesis-related thaumatin-like protein	0.866562	1.82331	9.11652	555.068	8.0326	4.23735e-05	0.00277741
245185_at	285	AT1G67760	ATP binding / protein binding / unfolded protein binding	0.868066	1.82521	5.78475	55.1296	11.8998	2.28256e-06	0.000448256
256966_at	12066	AT3G13400	SKS13 (SKU5 Similar 13); copper ion binding / oxidoreductase	0.870431	1.82821	10.0707	1075.44	6.52525	0.000183055	0.00717439
264603_at	19703	AT1G04670	hypothetical protein	0.870754	1.82862	6.39619	84.2258	9.01601	1.82737e-05	0.00174065
253946_at	9046	AT4G26790	GDSL-motif lipase/hydrolase family protein	0.871349	1.82937	9.29389	627.68	11.2036	3.60748e-06	0.000628143
266750_s_at	21850	AT2G47040;AT2G47030	[AT2G47040, VGD1 (VANGUARD1); pectinesterase];[AT2G47030, pectinesterase family protein]	0.871499	1.82956	10.6754	1635.38	7.41145	7.53102e-05	0.00404317
254716_at	9816	AT4G13560	UNE15 (unfertilized embryo sac 15)	0.873223	1.83175	10.0064	1028.53	6.62978	0.000164113	0.00667275
259925_at	15025	AT1G75040	PR5 (PATHOGENESIS-RELATED GENE 5)	0.875577	1.83474	7.62568	197.496	9.79504	9.8954e-06	0.00113424
257769_at	12869	AT3G23050	IAA7 (AUXIN RESISTANT 2); transcription factor	0.878528	1.8385	10.1129	1107.36	16.1881	2.12791e-07	9.51718e-05
253097_at	8197	AT4G37320	CYP81D5 (cytochrome P450, family 81, subfamily D, polypeptide 5); oxygen binding	0.878966	1.83906	7.45281	175.194	17.3749	1.22531e-07	6.49984e-05
262664_at	17764	AT1G13970	beta-hexosaminidase protein	0.879891	1.84024	5.77216	54.6505	10.8876	4.47841e-06	0.000713671
250688_at	5788	AT5G06510	NF-Y A10 (nuclear factor Y, subunit A10); CCAAT-binding transcription factor (CBF-B/NF-YA) family protein	0.88537	1.84724	5.82688	56.7632	7.01639	0.000110736	0.00527325
248060_at	3160	AT5G55560	protein kinase family protein	0.89222	1.85603	6.33305	80.6191	7.13497	9.84673e-05	0.0049128
264137_at	19237	AT1G78960	ATLUP2 (Arabidopsis thaliana lupeol synthase 2); lupeol synthase	0.89248	1.85636	11.4205	2740.97	14.8389	4.18382e-07	0.000149114
263950_at	19050	AT2G36020	abscisic acid-responsive HVA22 family protein	0.896986	1.86217	5.28354	38.9497	7.93667	4.62002e-05	0.00294365
260693_at	15793	AT1G32450	proton-dependent oligopeptide transport (POT) family protein	0.897515	1.86285	8.24631	303.66	4.56137	0.0018459	0.0342153
258338_at	13438	AT3G16150	L-asparaginase, putative / L-asparagine amidohydrolase, putative	0.900822	1.86713	8.5614	377.779	7.31455	8.26569e-05	0.00434425
264499_at	19599	AT1G30795	hydroxyproline-rich glycoprotein family protein	0.908524	1.87712	8.36957	330.743	8.6971	2.37968e-05	0.00204883
253725_at	8825	AT4G29340	PRF4 (PROFILIN 4); actin binding	0.908655	1.87729	8.34791	325.816	6.8157	0.000135546	0.00594186
266764_at	21864	AT2G47050	invertase/pectin methylesterase inhibitor family protein	0.909998	1.87904	10.1141	1108.29	6.64172	0.000162089	0.0066178
257261_s_at	12361	AT3G21920;AT3G21930	[AT3G21920, pollen coat receptor kinase];[AT3G21930, receptor-like protein kinase-related]	0.914292	1.88464	5.54009	46.5299	4.99036	0.00106513	0.0244669
248926_at	4026	AT5G45880	pollen Ole e 1 allergen and extensin family protein	0.919062	1.89089	9.99826	1022.77	7.5126	6.8405e-05	0.00377801
254762_at	9862	AT4G13230	late embryogenesis abundant domain-containing protein / LEA domain-containing protein	0.919863	1.89194	7.22518	149.622	12.3102	1.76231e-06	0.00037923
257067_at	12167	AT3G18270	CYP77A5P (cytochrome P450, family 77, subfamily A, polypeptide 5 pseudogene); catalytic	0.920272	1.89247	6.3372	80.8515	8.60724	2.56724e-05	0.00213083
264341_at	19441	AT1G70270	Helix-loop-helix DNA-binding transcription factor	0.923896	1.89723	6.80222	111.602	8.04746	4.1813e-05	0.00277254
265007_s_at	20107	AT1G61563;AT1G61566	[AT1G61563, RALFL8 (RALF-LIKE 8)];[AT1G61566, RALFL9 (RALF-LIKE 9)]	0.926808	1.90107	10.2958	1257.01	6.60313	0.000168728	0.00678779
258278_at	13378	no_match	no_match	0.926877	1.90116	4.99033	31.7862	6.83888	0.000132387	0.00586538
248714_at	3814	AT5G48140	pectin lyase-like superfamily protein	0.928396	1.90316	5.49952	45.2399	4.99486	0.00105916	0.0244035
246099_at	1199	AT5G20230	ATBCB (ARABIDOPSIS BLUE-COPPER-BINDING PROTEIN); copper ion binding	0.936792	1.91427	9.83306	912.109	14.0505	6.38189e-07	0.000192687
262122_at	17222	AT1G02790	PGA4 (POLYGALACTURONASE 4); polygalacturonase	0.937779	1.91558	10.298	1258.96	8.18186	3.71007e-05	0.00256444
264826_at	19926	AT1G03410	2-oxoglutarate (2OG) and Fe(II)-dependent oxygenase superfamily protein	0.938987	1.91718	5.01696	32.3784	12.2318	1.85055e-06	0.000390842
256303_at	11403	AT1G69550	disease resistance protein (TIR-NBS class)	0.940472	1.91916	4.44366	21.7608	9.09928	1.70782e-05	0.00167191
249942_at	5042	AT5G22300	NIT4 (NITRILASE 4)	0.946629	1.92736	6.894	118.933	6.67843	0.000156044	0.00650705
249536_at	4636	AT5G38760	late embryogenesis abundant protein (LEA) family protein	0.948205	1.92947	9.83903	915.888	7.17745	9.4446e-05	0.00477675
253334_at	8434	AT4G33360	terpene cyclase/mutase-related	0.948689	1.93012	8.64728	400.95	15.0481	3.75357e-07	0.000145117
248227_at	3327	AT5G53820	late embryogenesis abundant protein (LEA) family protein	0.94885	1.93033	9.87669	940.11	6.00158	0.000322642	0.0108387
249048_at	4148	AT5G44300	dormancy/auxin associated family protein	0.949497	1.9312	7.53053	184.89	11.9513	2.20868e-06	0.000448256
253829_at	8929	AT4G28040	nodulin MtN21 family protein	0.954755	1.93825	6.83051	113.812	8.66888	2.43688e-05	0.00206682
259934_at	15034	AT1G71340	glycerophosphoryl diester phosphodiesterase family protein	0.9551	1.93871	7.62147	196.921	12.413	1.65389e-06	0.000359288
246208_at	1308	AT4G36490	SEC14 cytosolic factor / phosphoglyceride transfer protein	0.957732	1.94225	5.89931	59.6857	6.20346	0.0002583	0.00924932
261913_at	17013	AT1G65860	FMO-GSOX1; flavin-containing monooxygenase family protein / FMO family protein	0.960358	1.94579	7.30779	158.439	6.88451	0.000126407	0.00567585
258297_at	13397	AT3G23325	Splicing factor 3B subunit 5/RDS3 complex subunit 10	0.969177	1.95772	9.51634	732.325	11.0859	3.90769e-06	0.000665182
263137_at	18237	AT1G78660	ATGGH1; gamma-glutamyl hydrolase	0.971444	1.9608	7.10272	137.446	11.0045	4.13136e-06	0.000687856
257497_at	12597	AT1G51430	cTAGE family protein	0.97538	1.96616	5.292	39.1789	8.27878	3.40688e-05	0.00244374
257819_at	12919	AT3G25165	RALFL25 (RALF-LIKE 25)	0.980026	1.9725	5.33571	40.384	6.30505	0.000231386	0.0085525
262099_s_at	17199	AT4G37390;AT1G59500	[AT4G37390, YDK1 (AUXIN UPREGULATED1, YADOKARI 1); indole-3-acetic acid amido synthetase];[AT1G59500, GH3.4; indole-3-acetic acid amido synthetase]	0.982192	1.97547	5.66184	50.6273	8.05847	4.1403e-05	0.00275336
260201_at	15301	AT1G67600	acid phosphatase/vanadium-dependent haloperoxidase-related protein	0.986931	1.98196	6.39258	84.0154	12.9721	1.18016e-06	0.00027752
266697_at	21797	AT2G19770	PRF5 (PROFILIN5); actin binding / actin monomer binding	0.988711	1.98441	8.06528	267.849	7.66225	5.94422e-05	0.00349453
246431_at	1531	AT5G17480	polcalcin, putative / calcium-binding pollen allergen, putative	0.991315	1.988	5.96465	62.4508	7.70582	5.70837e-05	0.00340859
266765_at	21865	AT2G46860	inorganic pyrophosphatase, putative (soluble) / pyrophosphate phospho-hydrolase, putative / PPase, putative	0.998081	1.99734	7.62669	197.634	7.80634	5.20289e-05	0.00319123
264166_at	19266	AT1G65370	meprin and TRAF homology domain-containing protein / MATH domain-containing protein	1.0032	2.00444	9.16177	572.752	12.4937	1.5739e-06	0.000348551
262156_at	17256	AT1G52680	late embryogenesis abundant protein-related / LEA protein-related	1.00546	2.00759	8.44435	348.339	9.02643	1.81192e-05	0.00173655
266654_at	21754	AT2G25890	glycine-rich protein / oleosin	1.00757	2.01053	5.87577	58.7194	9.71674	1.05044e-05	0.00119803
250445_at	5545	AT5G10760	aspartyl protease family protein	1.00773	2.01074	5.51133	45.6118	5.00798	0.00104194	0.0241531
257101_at	12201	AT3G25020	RBPG1 (RESPONSE TO BOTRYTIS POLYGALACTURONASES 1)	1.01617	2.02255	5.09098	34.0829	10.8135	4.71502e-06	0.00073163
263016_at	18116	AT1G23410	ribosomal protein S27a / Ubiquitin family protein	1.01816	2.02534	7.12037	139.138	10.2299	7.15432e-06	0.000937874
256581_at	11681	AT3G28830	mucin-like protein, putative	1.01916	2.02673	9.55747	753.504	7.47251	7.10543e-05	0.00386813
256008_s_at	11108	AT1G34040;AT1G34060	[AT1G34040, alliinase family protein];[AT1G34060, alliinase family protein]	1.04341	2.06109	5.85483	57.8733	6.28888	0.000235454	0.00866242
258101_at	13201	AT3G23590	MED33A, MED5A	1.04853	2.06842	8.59189	385.849	15.5318	2.93622e-07	0.000121773
266746_s_at	21846	AT2G02930;AT4G02520	[AT2G02930, ATGSTF3 (GLUTATHIONE S-TRANSFERASE 16); glutathione transferase];[AT4G02520, ATGSTF2 (Arabidopsis thaliana Glutathione S-transferase (class phi) 2); glutathione transferase]	1.05541	2.07831	6.59047	96.3669	11.0457	4.01652e-06	0.000673698
261037_at	16137	AT1G17420	LOX3 (Lipoxygenase 3); iron ion binding / lipoxygenase	1.06351	2.09001	7.95819	248.688	8.34321	3.22063e-05	0.00236193
261943_at	17043	AT1G80660	AHA9 (Arabidopsis H(+)-ATPase 9); hydrogen-exporting ATPase, phosphorylative mechanism	1.06637	2.09415	8.70572	417.527	10.8789	4.50542e-06	0.000713671
256955_at	12055	AT3G13390	SKS11 (SKU5 Similar 11); copper ion binding / oxidoreductase	1.0884	2.12638	8.44829	349.293	11.4323	3.0953e-06	0.000555935
247447_at	2547	AT5G62730	proton-dependent oligopeptide transport (POT) family protein	1.09247	2.13239	8.58171	383.136	9.18871	1.58903e-05	0.00159124
258561_at	13661	AT3G05960	STP6, SUGAR TRANSPORTER 6	1.09447	2.13535	6.0904	68.1387	6.73042	0.000147901	0.00625856
263126_at	18226	AT1G78460	SOUL heme-binding family protein	1.09499	2.13612	7.42936	172.369	10.9232	4.36931e-06	0.000701858
259561_at	14661	AT1G21250	WAK1 (CELL WALL-ASSOCIATED KINASE); kinase	1.09611	2.13778	8.34134	324.334	10.0467	8.18923e-06	0.0010152
256587_at	11687	AT3G28780	transmembrane protein	1.10189	2.14636	7.56829	189.794	8.35511	3.18749e-05	0.00235983
264658_at	19758	AT1G09910	rhamnogalacturonate lyase family protein	1.10437	2.15005	8.03446	262.189	14.0074	6.53529e-07	0.000193598
246633_at	1733	AT1G29720	leucine-rich repeat transmembrane protein kinase	1.10868	2.15649	5.15589	35.6515	9.29285	1.46217e-05	0.00149561
253226_at	8326	AT4G35010	BGAL11 (beta-galactosidase 11); beta-galactosidase	1.11874	2.17158	7.87237	234.326	6.73198	0.000147665	0.00625856
253534_at	8634	AT4G31500	CYP83B1 (CYTOCHROME P450 MONOOXYGENASE 83B1); oxygen binding	1.12175	2.17611	10.1101	1105.21	18.9576	6.1913e-08	4.15363e-05
250344_at	5444	AT5G11930	ROXY20; glutaredoxin family protein	1.13096	2.19005	6.7674	108.941	6.98686	0.000114048	0.00535314
259269_at	14369	AT3G01270	pectate lyase family protein	1.13207	2.19174	9.50283	725.501	9.44268	1.29898e-05	0.00139763
260179_at	15279	AT1G70690	HWI1 (HOPW1-1-INDUCED GENE1)	1.13832	2.20125	6.94715	123.396	18.6384	7.07335e-08	4.36062e-05
256875_at	11975	AT3G26330	CYP71B37 (cytochrome P450, family 71, subfamily B, polypeptide 37); oxygen binding	1.13938	2.20286	5.44841	43.6652	10.6096	5.44183e-06	0.000787855
245859_at	959	AT5G28290	AtNek3; NIMA-related serine/threonine kinase	1.14073	2.20493	7.67617	204.53	14.2799	5.63156e-07	0.000186261
261150_at	16250	AT1G19640	JMT (JASMONIC ACID CARBOXYL METHYLTRANSFERASE); jasmonate O-methyltransferase	1.15392	2.22518	7.8416	229.381	10.4094	6.27928e-06	0.000858095
256755_at	11855	AT3G25600	CML16 (CALMODULIN LIKE 16)	1.15501	2.22686	6.98467	126.647	16.7888	1.60186e-07	7.61216e-05
260419_at	15519	AT1G69730	wall-associated kinase family protein	1.15718	2.23022	6.885	118.193	13.4499	8.93714e-07	0.000248605
258113_at	13213	AT3G14650	CYP72A11 (cytochrome P450, family 72, subfamily A, polypeptide 11); oxygen binding	1.1749	2.25778	7.42944	172.379	15.2791	3.33508e-07	0.000133462
265280_at	20380	AT2G28355	LCR5 (Low-molecular-weight cysteine-rich 5)	1.19648	2.2918	7.68745	206.135	13.4018	9.18719e-07	0.000252482
249226_at	4326	AT5G42170	SGNH hydrolase-type esterase superfamily protein	1.19664	2.29204	5.10616	34.4436	11.8311	2.38546e-06	0.000457246
260869_at	15969	AT1G43800	acyl-(acyl-carrier-protein) desaturase / stearoyl-ACP desaturase	1.20591	2.30683	7.89221	237.571	10.2136	7.23996e-06	0.000938315
245658_at	758	AT1G28270	RALFL4 (RALF-LIKE 4)	1.21713	2.32484	7.66918	203.542	9.95037	8.80037e-06	0.00105098
247640_at	2740	AT5G60610	F-box/RNI-like superfamily protein	1.21965	2.32889	7.70951	209.312	15.7607	2.62053e-07	0.00011495
255666_at	10766	AT4G00390	DNA-binding storekeeper protein-related transcriptional regulator	1.22162	2.33208	6.42921	86.176	18.6805	6.9493e-08	4.36062e-05
252345_at	7445	AT3G48640	transmembrane protein	1.22194	2.33261	5.97612	62.9495	9.94149	8.85918e-06	0.00105249
257986_at	13086	AT3G20865	AGP40 (ARABINOGALACTAN-PROTEIN 40)	1.22996	2.34561	9.93249	977.185	8.80662	2.17141e-05	0.00194651
259044_at	14144	AT3G03430	calcium-binding EF-hand family protein	1.23854	2.3596	7.91575	241.478	13.3096	9.68799e-07	0.000255851
257763_s_at	12863	AT3G23120;AT3G23110	[AT3G23120, leucine-rich repeat family protein];[AT3G23110, disease resistance family protein]	1.24148	2.36441	5.68776	51.5451	7.64278	6.0531e-05	0.00353123
250606_s_at	5706	AT1G69940;AT5G07410	[AT1G69940, ATPPME1; pectinesterase];[AT5G07410, pectinesterase family protein]	1.26311	2.40013	10.0934	1092.46	6.73385	0.000147382	0.00625856
250174_at	5274	AT5G14380	AGP6 (ARABINOGALACTAN PROTEINS 6)	1.26384	2.40134	9.63423	794.682	11.1019	3.86511e-06	0.000664257
262080_at	17180	AT1G59650	CW14	1.26856	2.40921	7.74521	214.556	21.2279	2.54485e-08	2.32265e-05
256584_at	11684	AT3G28750	similar to unknown protein [Arabidopsis thaliana] (TAIR:AT5G39880.1); contains InterPro domain Globin-like; (InterPro:IPR009050)	1.27337	2.41726	9.41032	680.437	10.2761	6.91682e-06	0.00091198
245819_at	919	AT1G26310	CAL (CAULIFLOWER); DNA binding / transcription factor	1.27514	2.42022	7.09355	136.575	13.7393	7.58579e-07	0.000219028
251258_at	6358	AT3G62170	VGDH2 (VANGUARD 1 HOMOLOG 2); pectinesterase	1.27767	2.42448	9.18452	581.858	12.2458	1.83442e-06	0.000390842
248822_at	3922	AT5G47000	peroxidase superfamily protein	1.28228	2.43223	6.72802	106.007	8.95507	1.92079e-05	0.00178829
262050_at	17150	AT1G80130	Tetratricopeptide repeat (TPR)-like superfamily protein	1.28333	2.43401	6.80362	111.71	5.36003	0.000677325	0.0176974
266665_at	21765	AT2G29790	encodes a Maternally expressed gene (MEG) family protein [pseudogene]	1.30358	2.4684	5.85963	58.0663	7.80102	5.22835e-05	0.00319728
262760_at	17860	AT1G10770	invertase/pectin methylesterase inhibitor family protein	1.31582	2.48943	8.03718	262.683	13.1613	1.05596e-06	0.000267627
263031_at	18131	AT1G24070	ATCSLA10 (Cellulose synthase-like A10); transferase, transferring glycosyl groups	1.31736	2.4921	9.62126	787.568	19.5024	4.95704e-08	3.53344e-05
264100_at	19200	AT1G78970	LUP1 (LUPEOL SYNTHASE 1); lupeol synthase	1.32441	2.5043	7.09453	136.668	7.93294	4.63566e-05	0.00294538
263028_at	18128	AT1G24030	protein kinase superfamily protein	1.33051	2.51491	5.77647	54.8141	7.94166	4.59919e-05	0.00293859
249384_at	4484	AT5G39890	2-aminoethanethiol dioxygenase, putative	1.33882	2.52944	7.35185	163.353	14.1816	5.9402e-07	0.000190839
251625_at	6725	AT3G57260	BGL2 (PATHOGENESIS-RELATED PROTEIN 2); glucan 1,3-beta-glucosidase/ hydrolase, hydrolyzing O-glycosyl compounds	1.34317	2.53708	6.89387	118.922	4.94816	0.00112301	0.0254159
259842_at	14942	AT1G73600	phosphoethanolamine N-methyltransferase 3, putative (NMT3)	1.35218	2.55297	9.27217	618.304	20.8629	2.9172e-08	2.47147e-05
261532_at	16632	AT1G71680	amino acid permease	1.35647	2.56057	6.18065	72.5373	14.2524	5.71604e-07	0.000186261
253409_at	8509	AT4G32960	BRISC/BRCA1-A complex protein	1.35835	2.56392	8.36414	329.501	14.2744	5.64843e-07	0.000186261
258498_at	13598	AT3G02480	ABR (ABA-RESPONSE PROTEIN)	1.36031	2.56741	8.73805	426.987	11.779	2.46689e-06	0.000461228
259266_at	14366	AT3G01240	splicing regulatory glutamine/lysine-rich-like protein	1.36063	2.56797	8.05447	265.85	8.66862	2.43741e-05	0.00206682
251252_at	6352	AT3G62230	DAF1 (DUO1-ACTIVATED F-BOX 1)	1.37885	2.6006	6.63914	99.6738	9.50921	1.23312e-05	0.00134581
245946_at	1046	AT5G19580	glyoxal oxidase-related protein	1.38252	2.60724	9.50229	725.229	12.9069	1.22664e-06	0.000285506
247512_at	2612	AT5G61720	similar to unknown protein [Arabidopsis thaliana] (TAIR:AT3G28830.1); contains InterPro domain Protein of unknown function DUF1216; (InterPro:IPR009605)	1.39679	2.63316	7.87585	234.892	11.4457	3.06796e-06	0.000555398
257256_at	12356	AT3G21970	cysteine-rich repeat secretory protein, putative	1.40385	2.64606	6.14053	70.5477	9.14988	1.63944e-05	0.0016259
249495_at	4595	AT5G39100	GLP6 (GERMIN-LIKE PROTEIN 6); manganese ion binding / metal ion binding / nutrient reservoir	1.40832	2.65428	7.08621	135.882	10.6766	5.18998e-06	0.000773748
260888_at	15988	AT1G29140	pollen Ole e 1 allergen and extensin family protein	1.41607	2.66859	8.66653	406.337	9.87684	9.30089e-06	0.00108797
258170_at	13270	AT3G21600	senescence/dehydration-associated protein-related	1.43071	2.69579	6.64676	100.202	16.8707	1.54215e-07	7.48436e-05
258767_at	13867	AT3G10890	(1-4)-beta-mannan endohydrolase, putative	1.4327	2.69952	6.78828	110.529	4.22562	0.00289266	0.0454625
246841_at	1941	AT5G26700	germin-like protein, putative	1.43613	2.70595	6.96309	124.767	8.07612	4.07547e-05	0.00272614
257824_at	12924	AT3G25290	auxin-responsive family protein	1.45085	2.73368	7.63724	199.084	16.4205	1.90432e-07	8.68753e-05
247988_at	3088	AT5G56910	cysteine protease inhibitor	1.46731	2.76506	8.35791	328.08	21.5333	2.27401e-08	2.32265e-05
266070_at	21170	AT2G18660	expansin family protein (EXPR3)	1.48735	2.80373	6.98121	126.344	18.009	9.25746e-08	5.41443e-05
247718_at	2818	AT5G59310	LTP4 (LIPID TRANSFER PROTEIN 4); lipid binding	1.49599	2.82057	7.17722	144.73	13.0636	1.11815e-06	0.000271329
259265_at	14365	AT3G01250	transmembrane protein	1.50385	2.83599	5.9377	61.2949	9.18753	1.59054e-05	0.00159124
264505_at	19605	AT1G09380	integral membrane family protein / nodulin MtN21-related	1.53088	2.88962	7.21481	148.551	5.69395	0.000457325	0.0134255
248824_at	3924	AT5G46940	invertase/pectin methylesterase inhibitor family protein	1.57848	2.98655	6.58174	95.7857	16.7137	1.65884e-07	7.72208e-05
256977_at	12077	AT3G21040	copia-like retrotransposon family	1.60024	3.03194	6.17768	72.3883	19.744	4.5e-08	3.4215e-05
247717_at	2817	AT5G59320	LTP3 (LIPID TRANSFER PROTEIN 3); lipid binding	1.60603	3.04413	8.52924	369.452	21.254	2.52033e-08	2.32265e-05
256580_s_at	11680	AT3G28810;AT3G28820	[AT3G28810, mediator of RNA polymerase II transcription subunit-like protein, putative]	1.63943	3.11542	7.15271	142.292	19.6586	4.65586e-08	3.42581e-05
261244_at	16344	AT1G20150	subtilase family protein	1.64973	3.13775	6.64524	100.096	6.88831	0.000125921	0.00567585
250608_at	5708	AT5G07420	pectinesterase family protein	1.65245	3.14368	5.50596	45.4422	10.1318	7.68934e-06	0.00097441
267443_at	22543	AT2G19000	similar to glycine-rich protein [Arabidopsis thaliana] (TAIR:AT4G21620.1); similar to expressed protein [Oryza sativa (japonica cultivar-group)] (GB:ABA99958.1); contains InterPro domain Whey acidic protein, core region; (InterPro:IPR008197)	1.65291	3.14467	6.25288	76.2615	11.3056	3.36839e-06	0.000595604
257476_at	12576	AT1G80960	F-box and Leucine Rich Repeat domains containing protein	1.65831	3.15646	5.49536	45.1096	20.8554	2.92546e-08	2.47147e-05
258639_at	13739	AT3G07820	polygalacturonase 3 (PGA3) / pectinase	1.70784	3.26672	9.24867	608.314	13.3105	9.68312e-07	0.000255851
256582_at	11682	AT3G28840	similar to unknown protein [Arabidopsis thaliana] (TAIR:AT3G28780.1); similar to EBNA-1 [Human herpesvirus 4] (GB:ABB89251.1); contains InterPro domain Protein of unknown function DUF1216; (InterPro:IPR009605)	1.71406	3.28082	8.03256	261.843	15.6263	2.80097e-07	0.00011861
247424_at	2524	AT5G62850	ATVEX1 (VEGETATIVE CELL EXPRESSED1)	1.73411	3.32674	6.92731	121.711	14.4721	5.07848e-07	0.000172896
262232_at	17332	AT1G68600	aluminum activated malate transporter family protein	1.79047	3.45928	6.42462	85.9018	17.1854	1.3349e-07	6.92023e-05
264824_at	19924	AT1G03410;AT1G03420	[AT1G03410, 2A6]	1.80701	3.49917	7.74172	214.038	17.0637	1.41112e-07	7.15283e-05
259189_at	14289	AT3G01700	AGP11 (ARABINOGALACTAN PROTEIN 11)	1.83924	3.57821	7.85811	232.021	17.5002	1.15838e-07	6.2911e-05
253697_at	8797	AT4G29700	type I phosphodiesterase/nucleotide pyrophosphatase family protein	1.85181	3.60953	9.47773	712.984	27.0416	3.7587e-09	6.54664e-06
250631_at	5731	AT5G07430	pectinesterase family protein	1.8523	3.61076	7.49424	180.298	16.9004	1.52112e-07	7.48436e-05
257641_s_at	12741	AT3G25760;AT3G25770	[AT3G25760, AOC1 (ALLENE OXIDE CYCLASE 1)];[AT3G25770, AOC2 (ALLENE OXIDE CYCLASE 2)]	1.86629	3.64594	5.71339	52.469	25.5189	5.94769e-09	8.47918e-06
265080_at	20180	AT1G55570	SKS12 (SKU5 Similar 12); copper ion binding / oxidoreductase	1.86653	3.64653	8.59806	387.503	11.8998	2.28255e-06	0.000448256
254377_at	9477	AT4G21650	SBT3.1 ( SUBTILASE 3.13); subtilase family protein	1.87021	3.65585	7.859	232.165	13.1692	1.05109e-06	0.000267627
258027_at	13127	AT3G19515	apoptosis inhibitor	1.91073	3.76	7.16683	143.692	32.229	9.33812e-10	5.48858e-06
255515_at	10615	AT4G02250	invertase/pectin methylesterase inhibitor family protein	2.05433	4.15349	6.87199	117.132	14.1374	6.08536e-07	0.000192687
256766_at	11866	AT3G22231	PCC1 (PATHOGEN AND CIRCADIAN CONTROLLED 1)	2.11155	4.32157	7.07489	134.819	21.7381	2.1105e-08	2.29241e-05
264987_at	20087	AT1G27030	similar to unknown protein [Arabidopsis thaliana] (TAIR:AT1G27020.1); similar to unknown protein [Oryza sativa (japonica cultivar-group)] (GB:AAN05517.1); similar to Os10g0463800 [Oryza sativa (japonica cultivar-group)] (GB:NP_001064789.1); contains domain GatB/YqeY domain (SSF89095)	2.13794	4.40134	6.85078	115.422	30.6267	1.40013e-09	6.38738e-06
262733_s_at	17833	AT1G28660;AT1G28670	[AT1G28660, lipase, putative];[AT1G28670, ARAB-1 (Arabidopsis lipase); carboxylic ester hydrolase]	2.1873	4.55451	7.80133	223.066	26.8148	4.01811e-09	6.54664e-06
265179_at	20279	AT1G23650	hypothetical protein	2.23692	4.7139	5.48426	44.7638	14.0572	6.35872e-07	0.000192687
263161_at	18261	AT1G54020	myrosinase-associated protein, putative	2.33206	5.03523	7.43741	173.334	25.2262	6.51632e-09	8.60807e-06
250476_at	5576	AT5G10140	FLC (FLOWERING LOCUS C); transcription factor	2.44091	5.42984	6.3515	81.6565	28.3383	2.59299e-09	6.54664e-06
257628_at	12728	AT3G26290	CYP71B26 (cytochrome P450, family 71, subfamily B, polypeptide 26); oxygen binding	2.51764	5.72645	8.33984	323.997	21.227	2.54565e-08	2.32265e-05
262637_at	17737	AT1G06640	2-oxoglutarate-dependent dioxygenase, putative	2.58824	6.01364	9.03159	523.333	26.9416	3.87067e-09	6.54664e-06
258071_s_at	13171	AT3G26080;AT3G26070	[AT3G26080, plastid-lipid associated protein PAP / fibrillin family protein];[AT3G26070, plastid-lipid associated protein PAP / fibrillin family protein]	2.6535	6.2919	9.93208	976.907	33.216	7.34739e-10	5.48858e-06
264101_at	19201	AT1G79000	HAC1 (P300/CBP acetyltransferase-related protein 2 gene); transcription cofactor	2.74343	6.69662	7.56328	189.135	27.8778	2.95263e-09	6.54664e-06
258434_at	13534	AT3G16770	ATEBP/RAP2.3 (RELATED TO AP2 3); DNA binding / protein binding / transcription factor/ transcriptional activator	2.74374	6.69802	7.78596	220.702	19.0573	5.9419e-08	4.10711e-05
254481_at	9581	AT4G20480	putative endonuclease or glycosyl hydrolase	3.25192	9.52635	7.15034	142.059	28.8491	2.25044e-09	6.47181e-06
257008_at	12108	AT3G14210	ESM1 (EPITHIOSPECIFIER MODIFIER 1); carboxylic ester hydrolase	5.41771	42.7457	7.97334	251.312	57.045	9.87114e-12	2.25161e-07
